# Supplementary material for: Cell-Free Production of Pentacyclic Triterpenoid Compound Betulinic Acid from Betulin by the Engineered Saccharomyces cerevisiae
Source: PubMed Central journal article supplement (PMC6152010; doi:10.3390/molecules22071075), 2017-06-27
Supplement: molecules-22-01075-s001.pdf [file molecules-22-01075-s001.pdf]

1 **Supplementary Materials (Figures and Tables)**

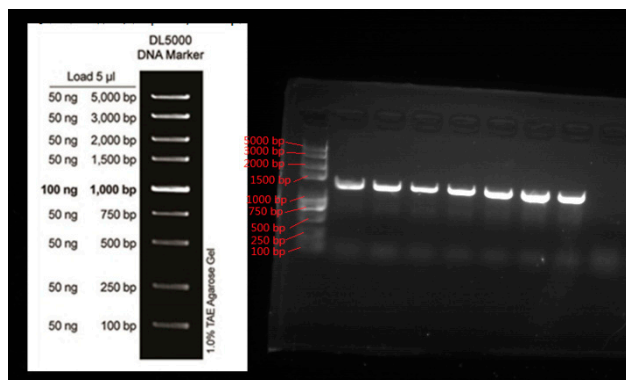

2

3

**Figure S1.** Agarose gel electrophoresis results of CYP716A12.

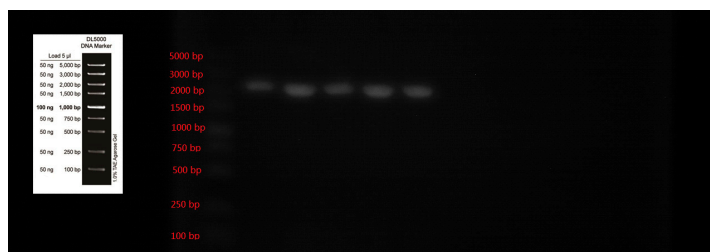

4

5

**Figure S2.** Agarose gel electrophoresis results of ATR1.

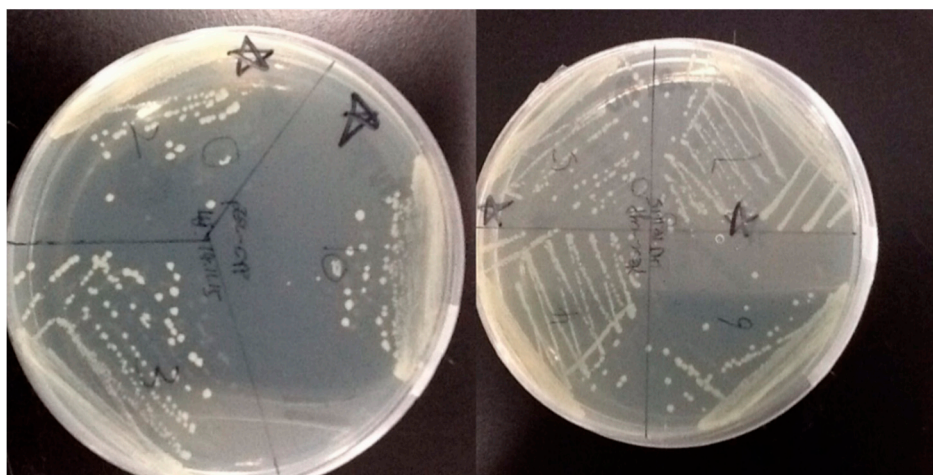

6

7

**Figure S3.** Purification and separation of a pESC-ura-CYP716A12 DH5α single colony.

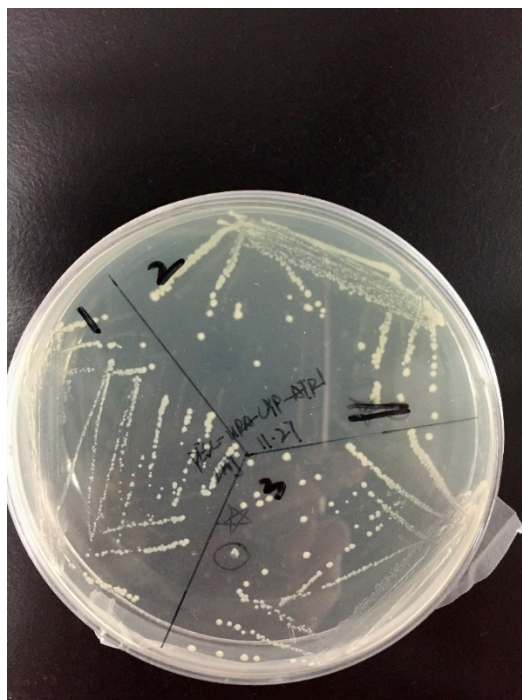

8

9

Figure S4. Purification and separation of a pESC-ura-CYP716A12-ATR1 DH5 $\alpha$  single colony.

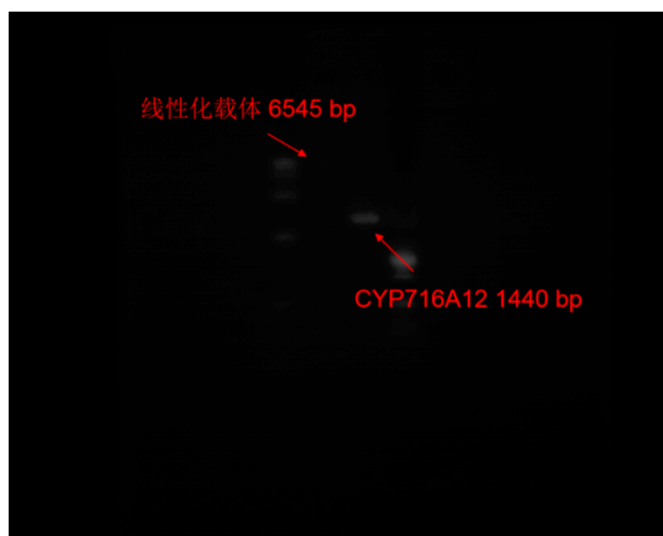

10

11

Figure S5. Agarose gel electrophoresis results of the added concentration of vector and targeting gene.

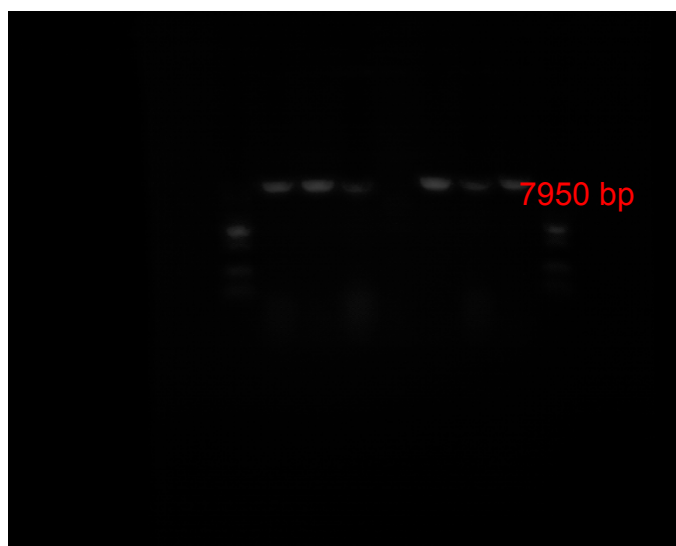

12

13

**Figure S6.** Colony PCR of a pESC-ura-CYP716A12 DH5 $\alpha$  single colony.

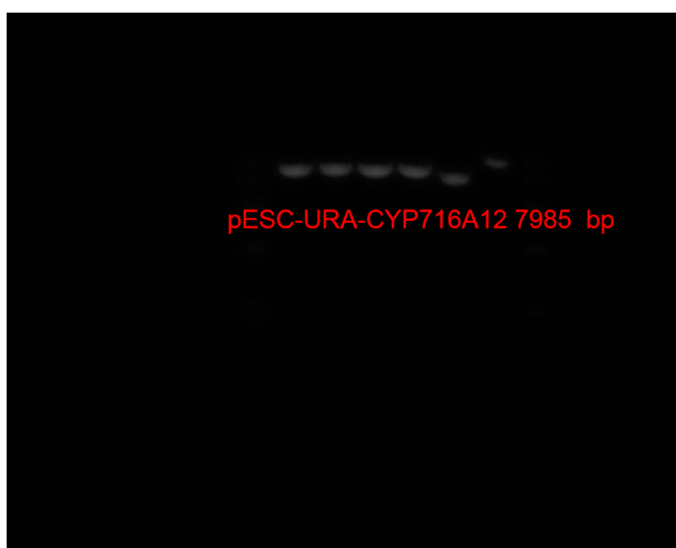

14

15

**Figure S7.** Agarose gel electrophoresis results of plasmid from pESC-ura-CYP716A12 DH5 $\alpha$ .

16

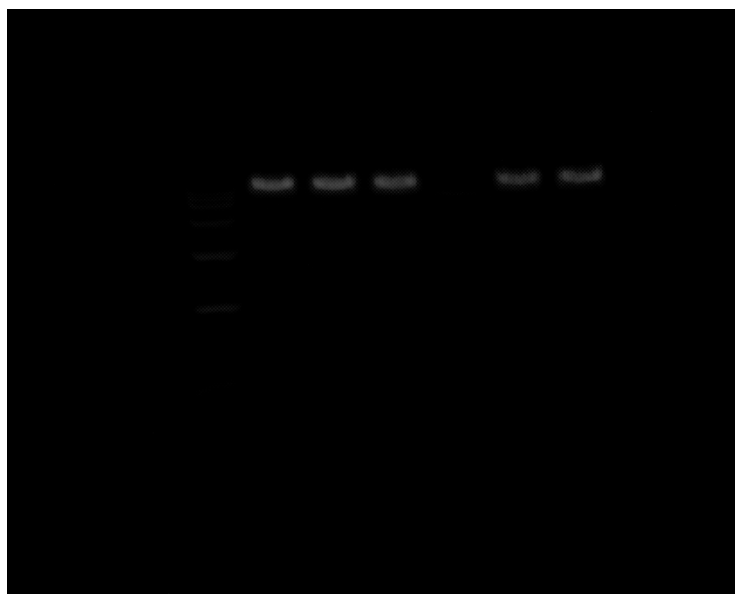

17

18

**Figure S8.** Agarose gel electrophoresis results of linearized pESC-ura-CYP716A12.

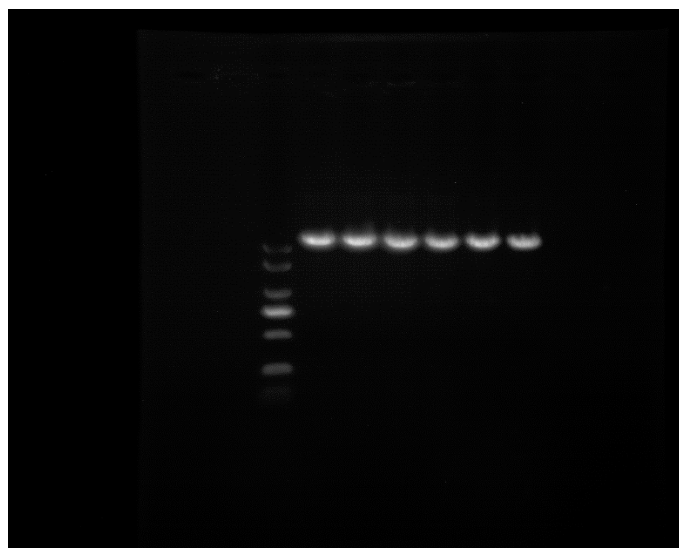

19

20

**Figure S9.** Colony PCR of pESC-ura-CYP716A12-ATR1 DH5 $\alpha$ .

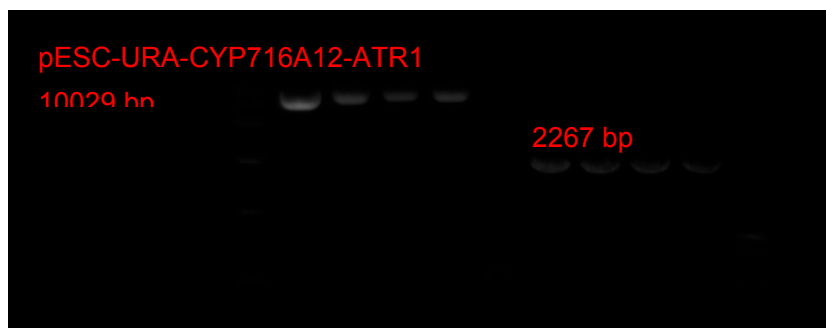

21

22

**Figure S10.** Agarose gel electrophoresis results of plasmid from pESC-ura-CYP716A12-ATR1 DH5 $\alpha$ .

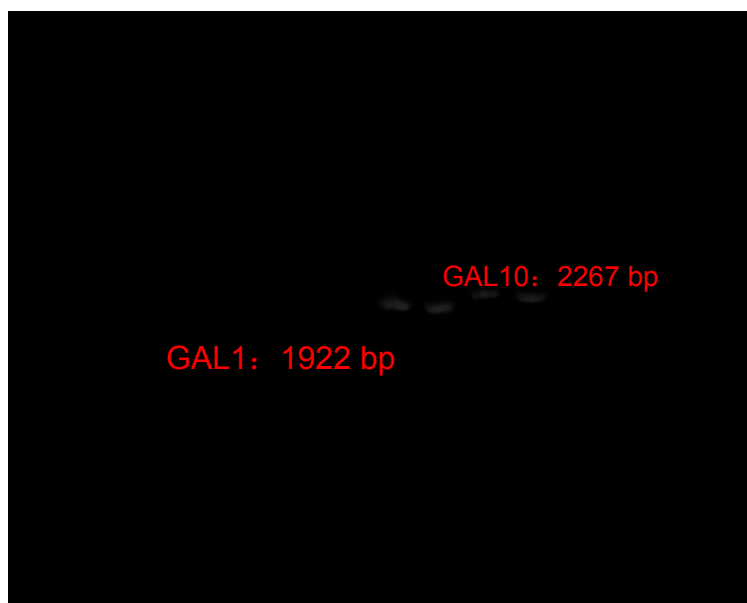

23

24

25

**Figure S11.** Agarose gel electrophoresis results of specific primer PCR of plasmid from *Saccharomyces cerevisiae* ZJUQH311.

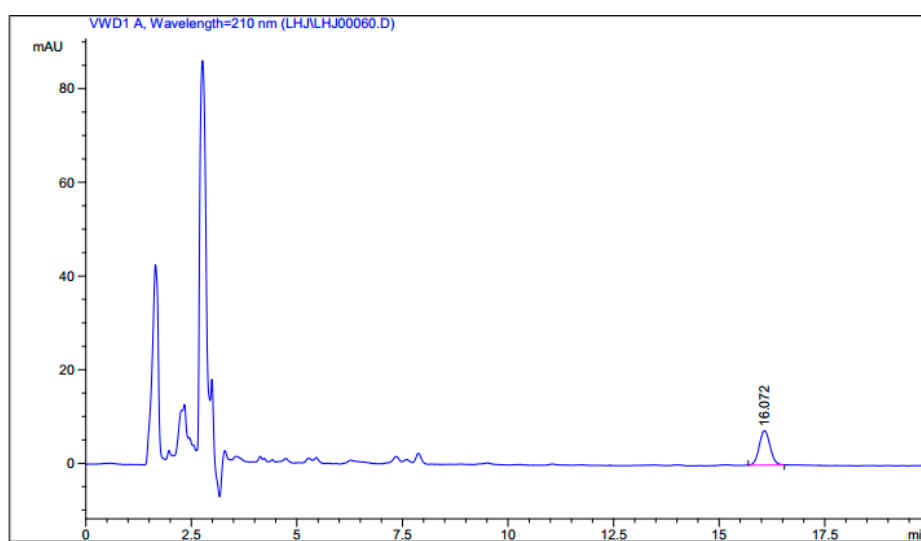

26

27

**Figure S12.** HPLC chromatograms of microsome protein from the total protein extraction.

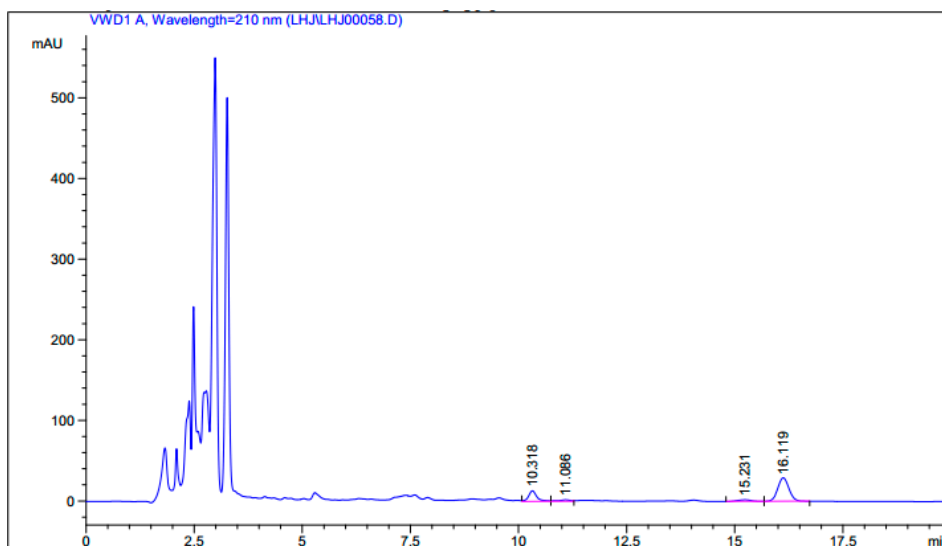

28

29

Figure S13. HPLC chromatograms of microsome protein from the microsome protein extraction.

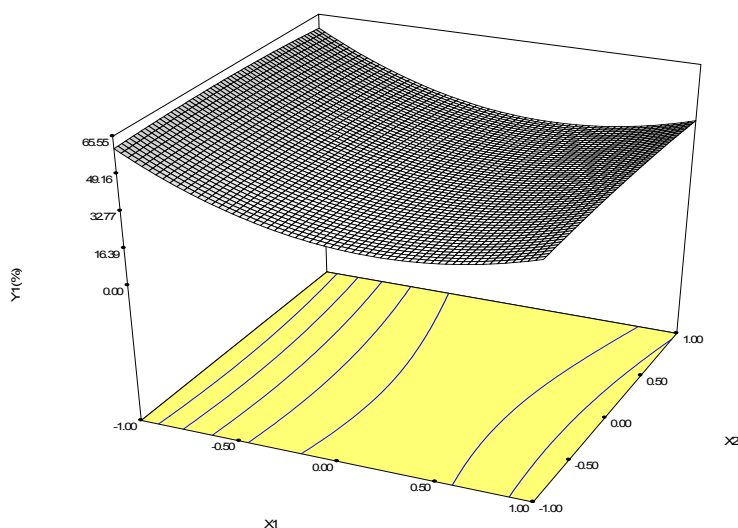

30

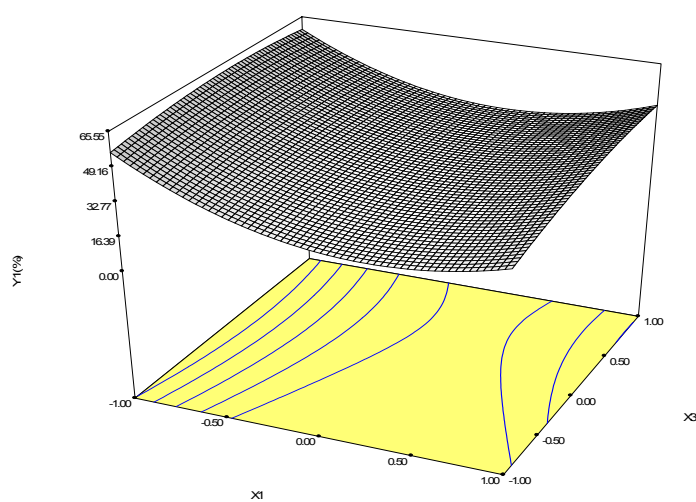

31

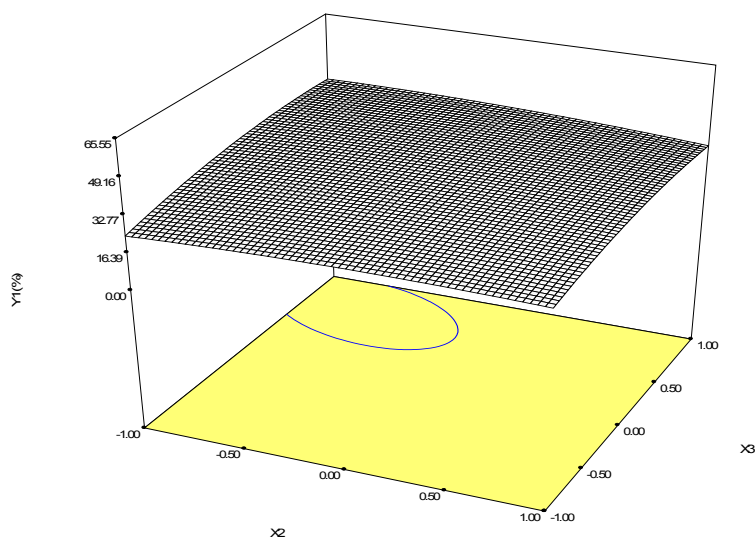

32  
33  
34

**Figure S14.** The response surface plot of conversion time ( $X_1$ ), betulin ( $X_2$ ), and NADPH ( $X_3$ ) against betulin conversion.

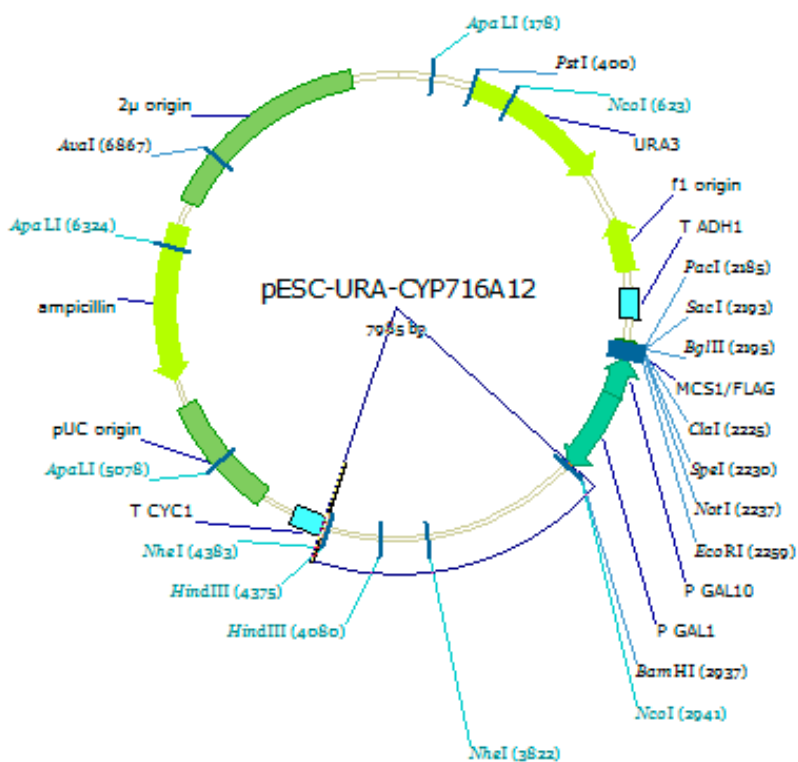

35  
36

**Figure S15.** Schematic diagram of pESC-ura-CYP716A12.

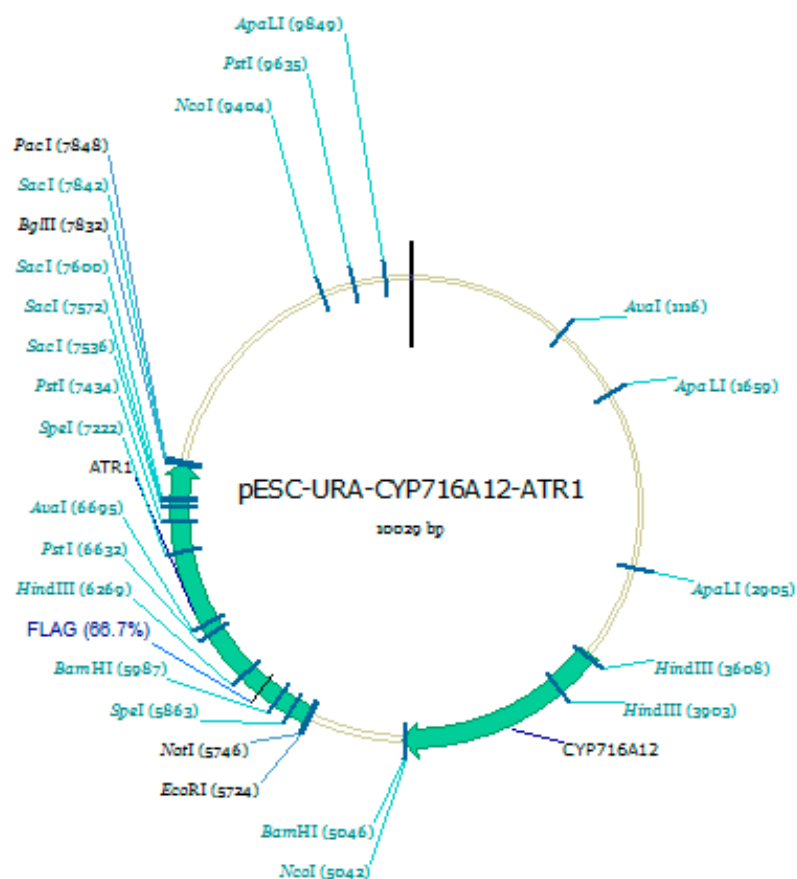

37

38

Figure S16. Schematic diagram of pESC-ura-CYP716A12-ATR1.

39

Table S1. Results of the response surface methodology regression analysis for betulin conversion ( $Y_1$ ).

| Source                        | Sum of squares | DF | Mean Square | F value | Prob > F |
|-------------------------------|----------------|----|-------------|---------|----------|
| Model                         | 2269.72        | 9  | 252.19      | 9.74    | 0.0033   |
| X <sub>1</sub>                | 645.31         | 1  | 645.31      | 24.92   | 0.0016   |
| X <sub>2</sub>                | 11.08          | 1  | 11.08       | 0.43    | 0.5340   |
| X <sub>3</sub>                | 113.74         | 1  | 113.74      | 4.39    | 0.0743   |
| X <sub>1</sub> <sup>2</sup>   | 1430.38        | 1  | 1430.38     | 55.23   | 0.0001   |
| X <sub>2</sub> <sup>2</sup>   | 13.18          | 1  | 13.18       | 0.51    | 0.4987   |
| X <sub>3</sub> <sup>2</sup>   | 61.40          | 1  | 61.40       | 2.37    | 0.1675   |
| X <sub>1</sub> X <sub>2</sub> | 1.15           | 1  | 1.15        | 0.04    | 0.8394   |
| X <sub>1</sub> X <sub>3</sub> | 18.11          | 1  | 18.11       | 0.70    | 0.4307   |
| X <sub>2</sub> X <sub>3</sub> | 11.82          | 1  | 11.82       | 0.46    | 0.5210   |
| Residual                      | 181.29         | 7  | 25.90       |         |          |
| Lack of Fit                   | 148.86         | 3  | 49.62       | 6.12    | 0.0563   |
| Pure error                    | 32.43          | 4  | 8.11        |         |          |
| Cor Total                     | 2451.01        | 16 |             |         |          |

40
